# Supplementary material for: Enhanced Degradation of Decabromodiphenyl Ether via Synergetic Assisted Mechanochemical Process with Lithium Cobalt Oxide and Iron
Source: MDPI journal article supplement (doi:10.3390/app132312924), 2023-12-02
Supplement: s1 [file s1]

Archive with 1 entries (1 files):
- applsci-2701018-supplementary.pdf
