# Supplementary material for: Enhanced Degradation of Decabromodiphenyl Ether via Synergetic Assisted Mechanochemical Process with Lithium Cobalt Oxide and Iron
Source: MDPI journal article supplement (doi:10.3390/app132312924), 2023-12-02
Supplement: s1 [file s1 › applsci-2701018-supplementary.pdf]

## ***Supplementary Materials***

**for**

### **Enhanced degradation of decabromodiphenyl ether via synergetic assisted mechanochemical process with lithium cobalt oxide and iron**

Xiaoyi Lou <sup>1</sup>, Yifan Sui <sup>2</sup>, Qichao Zhang <sup>2</sup>, Changling Fang <sup>1</sup>, Yunyu Tang <sup>1</sup>, Xuan Zhang <sup>1</sup>, Guangxin Yang <sup>1</sup>, Yongfu Shi <sup>1</sup>, Dongmei Huang <sup>1,\*</sup>, Jie Guan <sup>2</sup> and Yaoguang Guo <sup>1,\*</sup>

<sup>1</sup> Laboratory of Quality Safety and Processing for Aquatic Product, East China Sea Fisheries Research Institute, Chinese Academy of Fishery Sciences, Shanghai 200090, China; huoxingmayi@126.com (X.L.); fangling0334081@163.com (C.F.); hi\_tyy@163.com (Y.T.); zhangxuan0430@163.com (X.Z.); guo5142@126.com (G.Y.); xyzmn530@sina.com (Y.S.)

<sup>2</sup> Shanghai Collaborative Innovation Centre for WEEE Recycling, School of Resources and Environmental Engineering, Shanghai Polytechnic University, Shanghai 201209, China; suiyifan333@163.com (Y.S.); ccscr007@163.com (Q.Z.); guanjie@sspu.edu.cn (J.G.)

\* Correspondence: hdm2001@126.com (D.H.); ygguo@sspu.edu.cn (Y.G.)

**15 Figures**

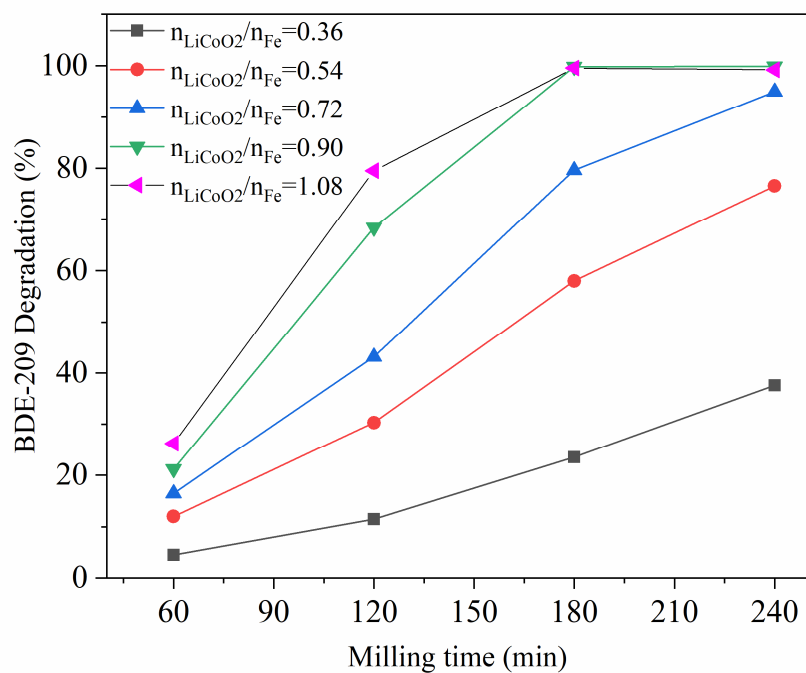

**Figure S1.** The effect of grinding reagent molar ratio between  $\text{LiCoO}_2$  and Fe ( $n_{\text{LiCoO}_2}/n_{\text{Fe}}$ ) on the degradation of BDE209 in MC treatment.

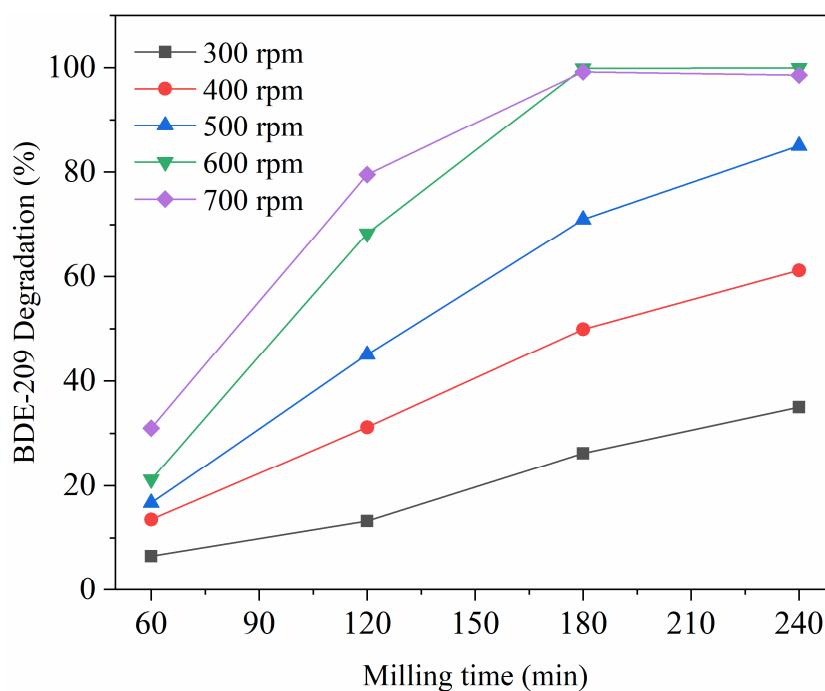

**Figure S2.** The effect of rotation speed on the degradation of BDE209 in MC treatment.

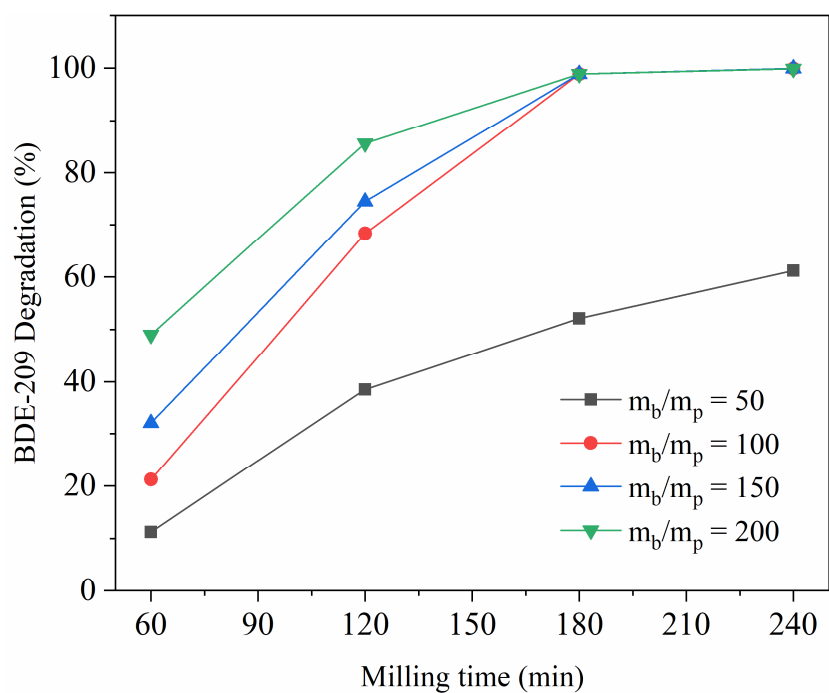

**Figure S3.** The effect of ball-to-powders mass ratio ( $m_b/m_p$ ) on the degradation of BDE209 in MC treatment.

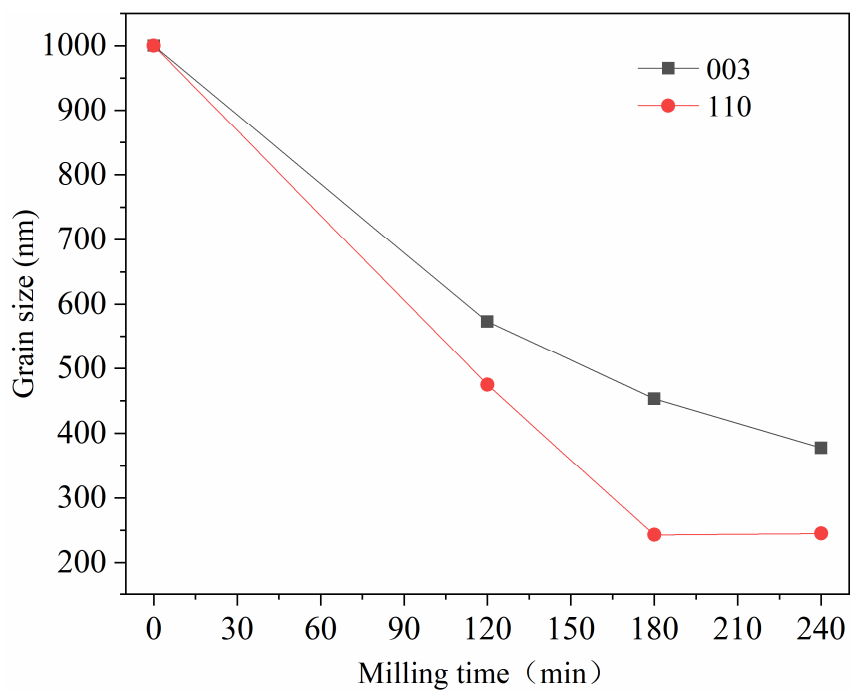

**Figure S4.** Grain size changes of different crystal plane with varying milling time.

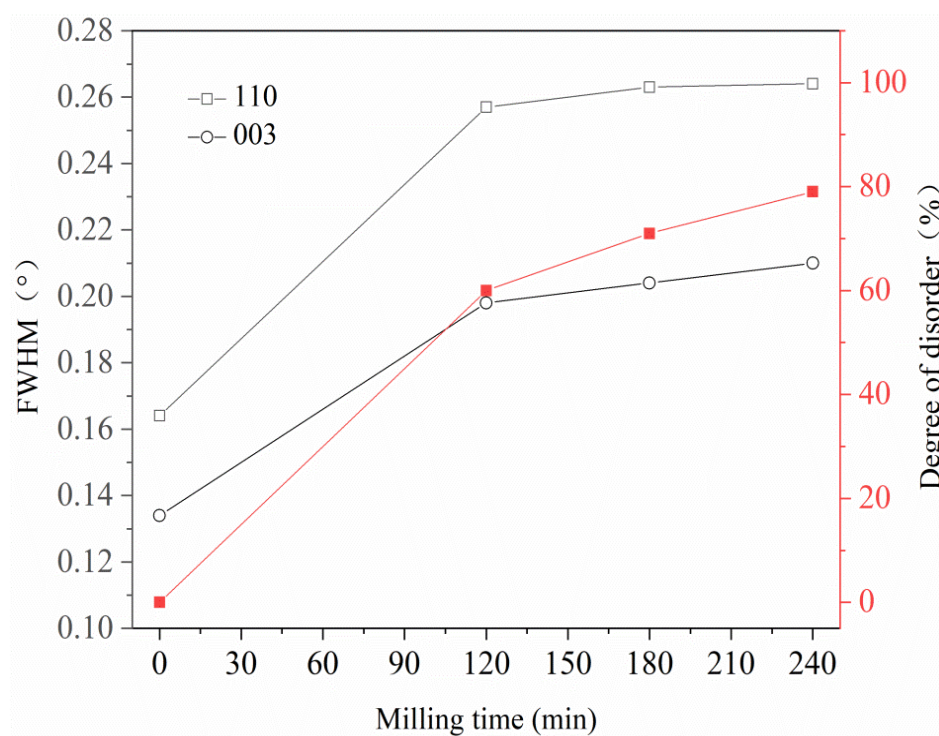

**Figure S5.** FWHM and disorder degree changes of different crystal plane with varying milling time.

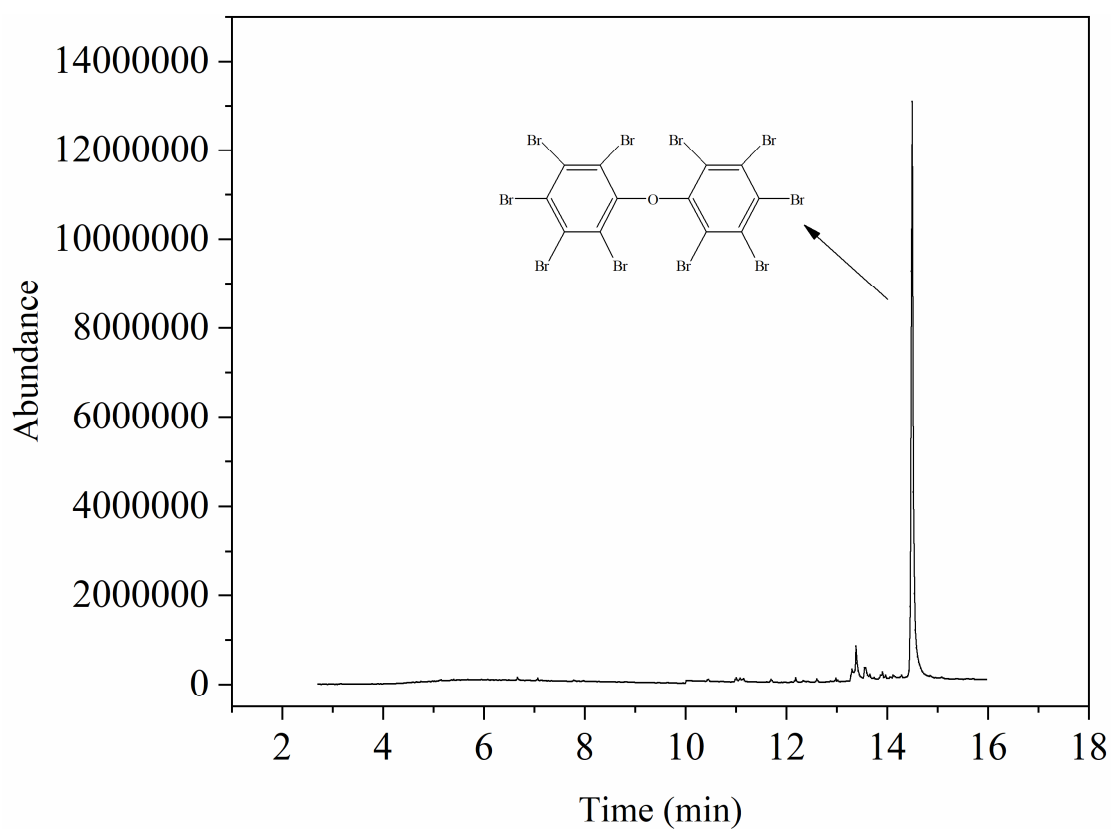

**Figure S6.** GC chromatogram of BDE 209 before MC treatment.

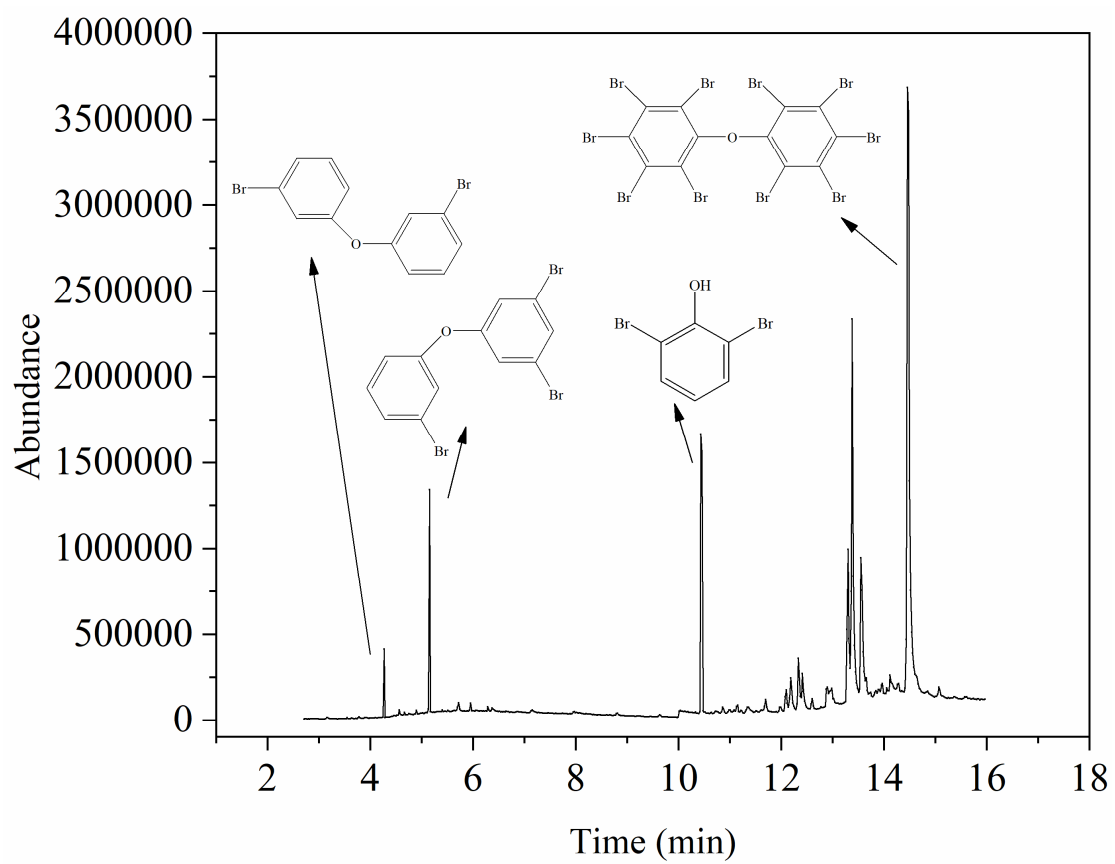

**Figure S7.** GC chromatogram of BDE 209 after 60 min ball milling time.

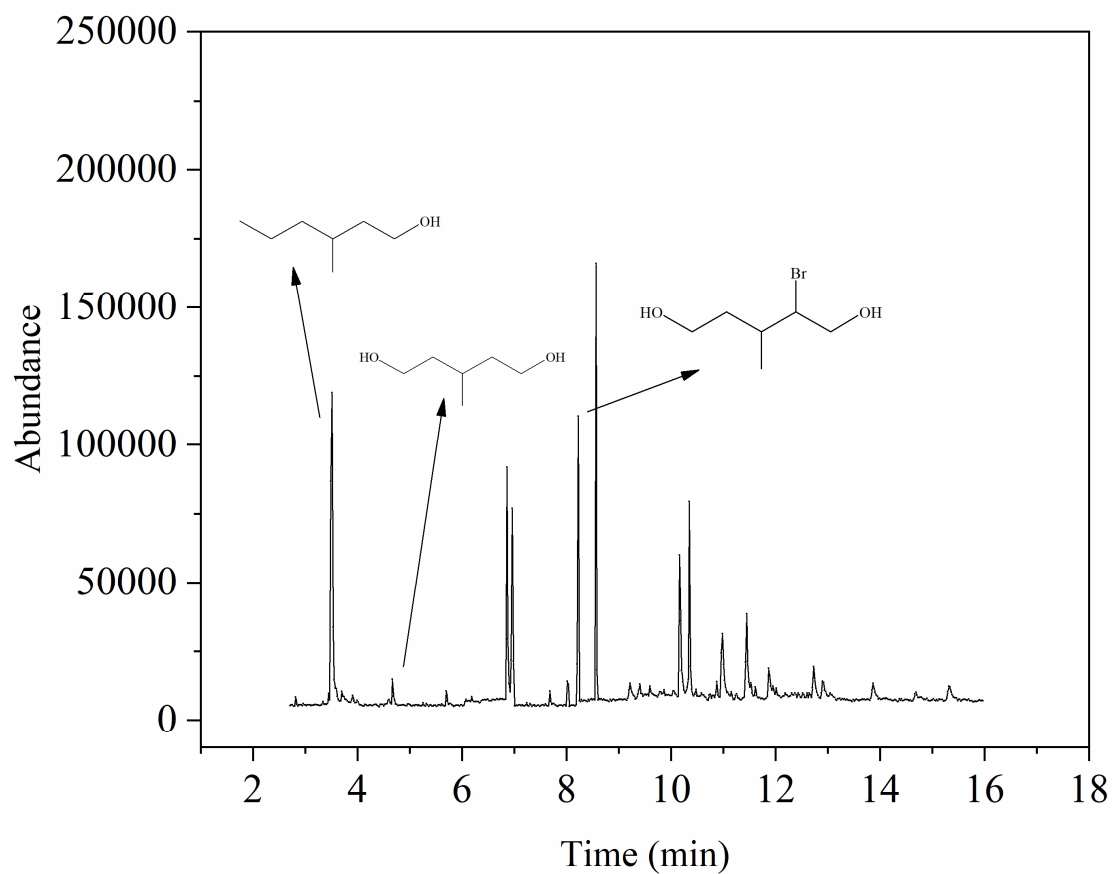

**Figure S8.** GC chromatogram of BDE 209 after 180 min ball milling time.

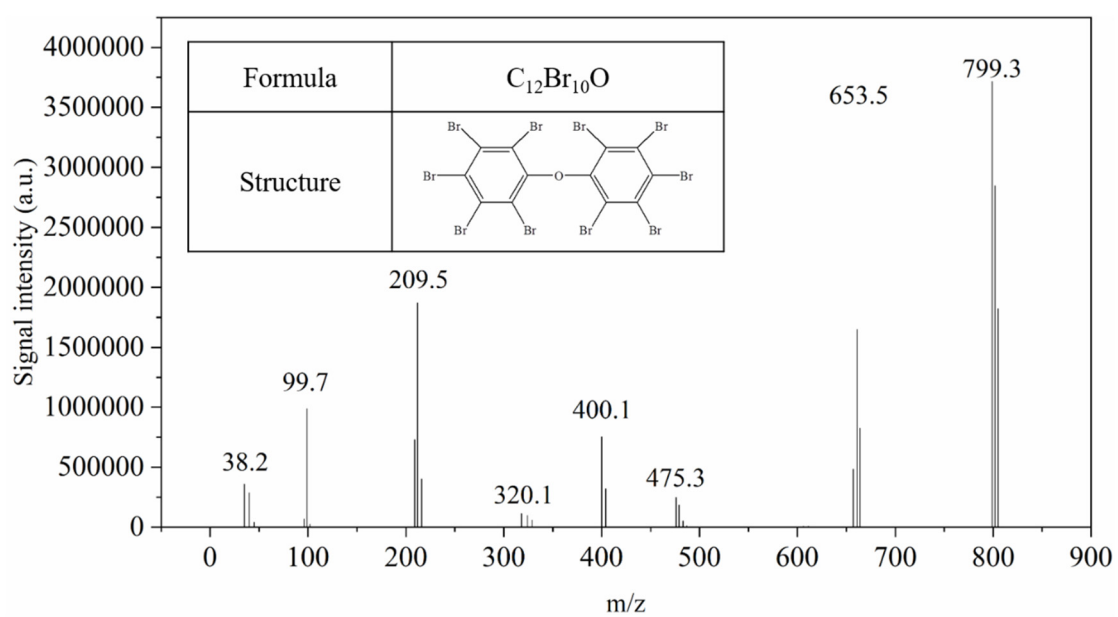

**Figure S9.** GC-MS spectrum of decabromodiphenyl ether.

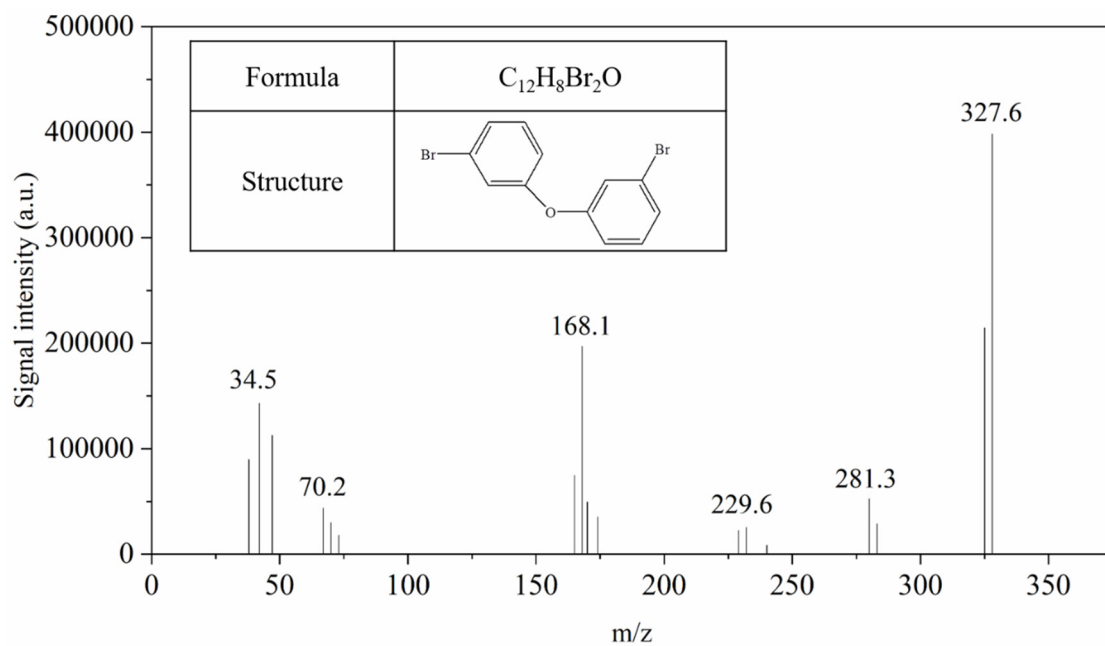

**Figure S10.** GC-MS spectrum of dibromodiphenyl ether (P1).

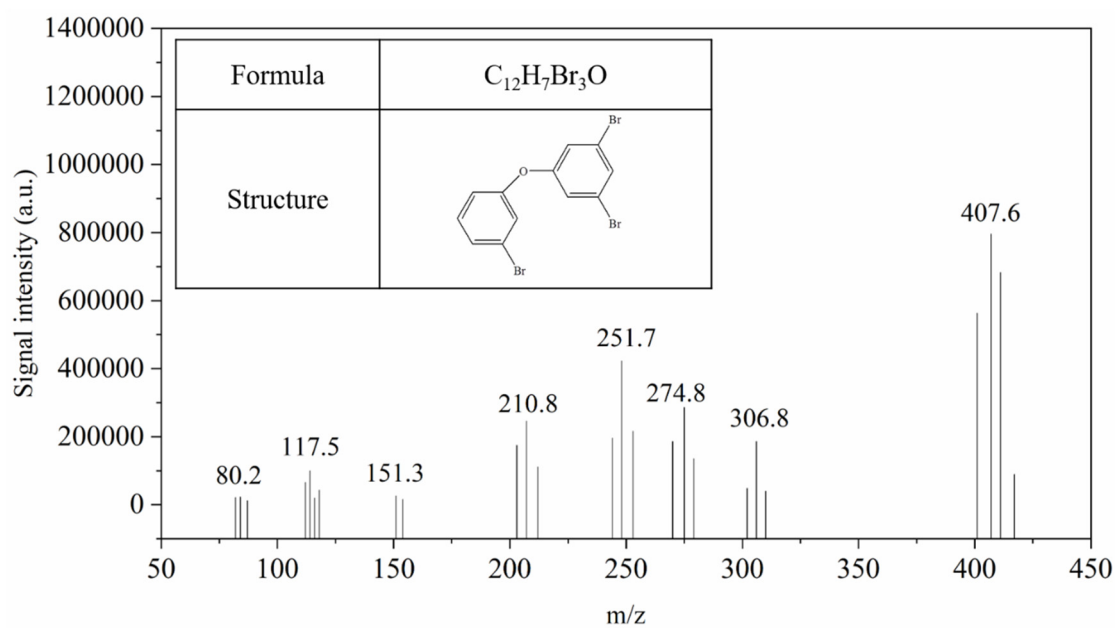

**Figure S11.** GC-MS spectrum of tribromodiphenyl ether (P2).

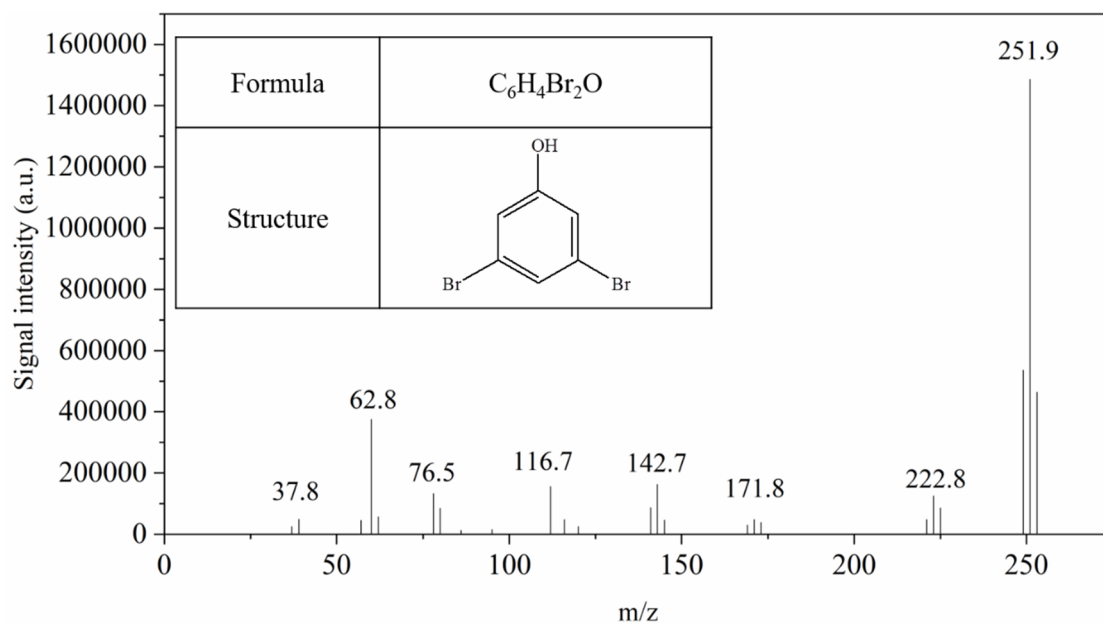

**Figure S12.** GC-MS spectrum of 3,5-dibromophenol (P5).

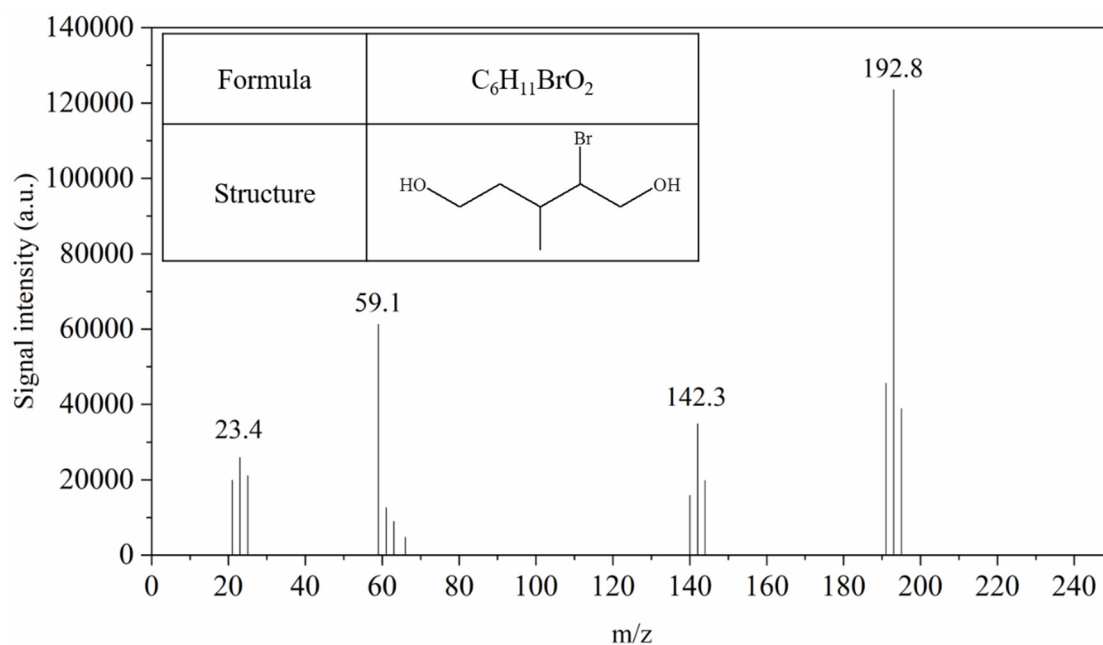

**Figure S13.** GC-MS spectrum of 2-bromo-3-methyl-hexane-1,5-diol (P6).

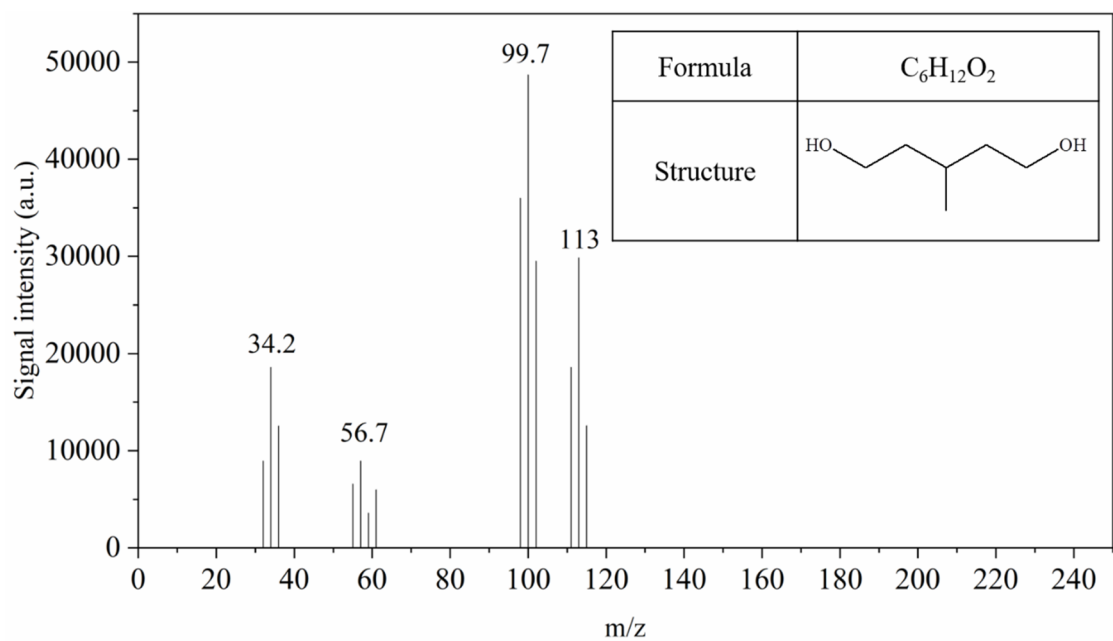

**Figure S14.** GC-MS spectrum of 3-methyl-1,5-hexanediol (P7).

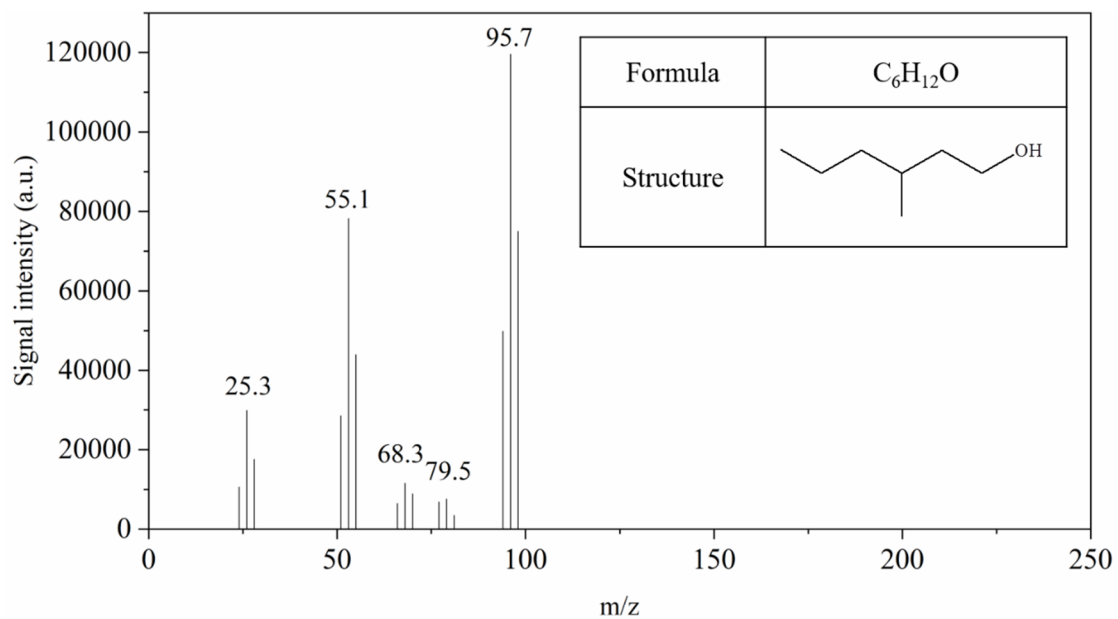

**Figure S15.** GC-MS spectrum of 3-methyl-1-hexanol (P8).
